# Supplementary material
Source: PubMed Central journal article supplement (PMC2643520)
Supplement: M808604200_1.pdf [file M808604200_1.pdf]

Supplementary Figures

for

**STRUCTURE AND FUNCTIONAL ANALYSIS OF RifR, THE TYPE II  
THIOESTERASE FROM THE RIFAMYCIN BIOSYNTHETIC PATHWAY**  
**Heather B. Claxton<sup>1,2,3</sup>, David L. Akey<sup>1,3</sup>, Monica K. Silver<sup>2</sup>, Suzanne J. Admiraal<sup>2</sup>, Janet L.  
Smith<sup>1,2</sup>**

<sup>1</sup>Life Science Institute and <sup>2</sup>Department of Biological Chemistry, University of Michigan, <sup>3</sup>These authors contributed equally to this work.

10 20 30 40 50 60 70

|                                    |                                                                                     |       |       |       |       |                                                                                     |       |       |       |       |       |
|------------------------------------|-------------------------------------------------------------------------------------|-------|-------|-------|-------|-------------------------------------------------------------------------------------|-------|-------|-------|-------|-------|
| <i>A.mediterranei_RifR</i>         | -----                                                                               | ----- | ----- | ----- | ----- | -----                                                                               | ----- | ----- | ----- | ----- | ----- |
| <i>A.noursei_NysE</i>              | -----                                                                               | ----- | ----- | ----- | ----- | -----                                                                               | ----- | ----- | ----- | ----- | ----- |
| <i>S.fraidea_TyIO</i>              | -----                                                                               | ----- | ----- | ----- | ----- | -----                                                                               | ----- | ----- | ----- | ----- | ----- |
| <i>S.venezuelae_PikAV</i>          | -----                                                                               | ----- | ----- | ----- | ----- | -----                                                                               | ----- | ----- | ----- | ----- | ----- |
| <i>P.aeruginosa_PchC</i>           | -----                                                                               | ----- | ----- | ----- | ----- | -----                                                                               | ----- | ----- | ----- | ----- | ----- |
| <i>S.tendae_NikP2</i>              | -----                                                                               | ----- | ----- | ----- | ----- | -----                                                                               | ----- | ----- | ----- | ----- | ----- |
| <i>S.erythraea_Eryorf5</i>         | -----                                                                               | ----- | ----- | ----- | ----- | -----                                                                               | ----- | ----- | ----- | ----- | ----- |
| <i>Kutzneria.sp744_KtzF</i>        | -----                                                                               | ----- | ----- | ----- | ----- | -----                                                                               | ----- | ----- | ----- | ----- | ----- |
| <i>A.migulanus_GrsT</i>            | -----                                                                               | ----- | ----- | ----- | ----- | -----                                                                               | ----- | ----- | ----- | ----- | ----- |
| <i>B.licheniformis_BacT</i>        | -----                                                                               | ----- | ----- | ----- | ----- | -----                                                                               | ----- | ----- | ----- | ----- | ----- |
| <i>B.brevis_TycF</i>               | -----                                                                               | ----- | ----- | ----- | ----- | -----                                                                               | ----- | ----- | ----- | ----- | ----- |
| <i>B.subtilis_SrfTEI_2RON</i>      | -----                                                                               | ----- | ----- | ----- | ----- | -----                                                                               | ----- | ----- | ----- | ----- | ----- |
| <i>Rat_FAS_TEI</i>                 | METAVNAKSPRNEK                                                                      | ----- | ----- | ----- | ----- | -----                                                                               | ----- | ----- | ----- | ----- | 14    |
| <i>B.subtilis_SrfTEI_1JMK</i>      | GGSD                                                                                | ----- | ----- | ----- | ----- | -----                                                                               | ----- | ----- | ----- | ----- | 4     |
| <i>E.coli_EntF_2ROQ</i>            | -----                                                                               | ----- | ----- | ----- | ----- | -----                                                                               | ----- | ----- | ----- | ----- | ----- |
| <i>B.subtilis_FenTE_2CB9</i>       | MARSQLSAAGEQH                                                                       | ----- | ----- | ----- | ----- | -----                                                                               | ----- | ----- | ----- | ----- | 13    |
| <i>B.subtilis_Myc_TE</i>           | KTENVF                                                                              | ----- | ----- | ----- | ----- | -----                                                                               | ----- | ----- | ----- | ----- | 6     |
| <i>B.licheniformis_BacC_TE</i>     | DCMQL                                                                               | ----- | ----- | ----- | ----- | -----                                                                               | ----- | ----- | ----- | ----- | 5     |
| <i>B.brevis_TycC_TE</i>            | RYGTA                                                                               | ----- | ----- | ----- | ----- | -----                                                                               | ----- | ----- | ----- | ----- | 5     |
| <i>B.brevis_GrsB_TE</i>            | LP                                                                                  | ----- | ----- | ----- | ----- | -----                                                                               | ----- | ----- | ----- | ----- | 2     |
| <i>hFAS_TEI_1XKT</i>               | GAMVNLRSLLVNPEGPTLMRLNS                                                             | ----- | ----- | ----- | ----- | -----                                                                               | ----- | ----- | ----- | ----- | 23    |
| <i>S.venezuelae_PikTE_2HFJ</i>     | SGADTGAGAG                                                                          | ----- | ----- | ----- | ----- | MFRALFRQAVEDDRYGEFLDVLAEASAF                                                        | ----- | ----- | ----- | ----- | 38    |
| <i>S.fraidea_TyIGV</i>             | MGTGAAPADAGSG                                                                       | ----- | ----- | ----- | ----- | L PAL YREAVRTGRAAEMAELL AAASRF                                                      | ----- | ----- | ----- | ----- | 40    |
| <i>Streptomyces.sp.CK4412_TmcB</i> | AQSDYFGELFLQA                                                                       | ----- | ----- | ----- | ----- | MRTGELAQAQQLMAGAAQL                                                                 | ----- | ----- | ----- | ----- | 32    |
| <i>S.erythraea_DEBSTE_1MO2</i>     | MASQLDSGTPAREASSALRDG                                                               | ----- | ----- | ----- | ----- | YRQAGVSGRVRSYLDL LAGL SDF                                                           | ----- | ----- | ----- | ----- | 44    |
| <i>A.erythreum_EryAIII</i>         | ATVVVFQHPTPRALAEVRLVLELGRAAGSPTPSAAGGSL                                             | ----- | ----- | ----- | ----- | VEGY - RRAEAESSRVRPFLSLMADLAEF                                                      | ----- | ----- | ----- | ----- | 62    |
| <i>S.rochei_LkmAIII</i>            | ATTLVFDHPSVTDVAAAYLRPLL TSETPHPAADGGGM                                              | ----- | ----- | ----- | ----- | LRGL YERSVQQGRFDSYL EL LGEL AGH                                                     | ----- | ----- | ----- | ----- | 63    |
| <i>M.griseorubida_MycAV</i>        | STVVFDQPTPRELAEYLDELGPPVSRAGATGGSAGAVGPTGEDS IG                                     | ----- | ----- | ----- | ----- | VL FRRAVRDGRRDQGFDLL HAAAAL                                                         | ----- | ----- | ----- | ----- | 71    |
| <i>S.parvulus_BorA6</i>            | ATL TL EQRT PAGL AAHLRER I ADRPVGSGAVPVPGSADVPEAGGGSGL GELWQEADRHRRL EF IDVL TAAAAF | ----- | ----- | ----- | ----- | SS I VFDKSPVKLARWL HQEL ANGPQPGATGPAAADARPAVRSDDTL - EGL FYNVAVRGGKL VEAMRML KAVANT | ----- | ----- | ----- | ----- | 74    |
| <i>S.noursei_NysK</i>              | SS I VFDKSPVKLARWL HQEL ANGPQPGATGPAAADARPAVRSDDTL - EGL FYNVAVRGGKL VEAMRML KAVANT | ----- | ----- | ----- | ----- | -----                                                                               | ----- | ----- | ----- | ----- | 73    |

RifR Secondary structure

SrfTEI Secondary structure

PikTE Secondary structure

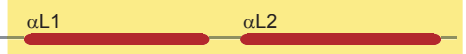

80 90 100 110 120 130 140

|                                    |                                                                                  |
|------------------------------------|----------------------------------------------------------------------------------|
| <i>A.mediterranei_RifR</i>         | -----MHRPEAEKWLRRFERAP-D-----ARARLVCLPHA--GGSASFFFLAKALAP-A--VEVLAVQYP-55        |
| <i>A.noursei_NysE</i>              | -----MTTSTEEESLWARCFHPAP-A-----APVRLFCFPHA--GGSASFYFPVSAQLSS-V--AEVFAIQYP-56     |
| <i>S.fraidea_TyIO</i>              | -----MMLRCYAPVPGT-----PAHRLVCFPHA--GGSARAYRPFAL ELAAG--VETHAVQYP-50              |
| <i>S.venezuelae_PikAV</i>          | -----MTRDPLNVDSGLWIRRFHPAP-N-----SAVRLVCLPHA--GGSASYFRFSEELHP-S--VEALSVQYP-59    |
| <i>P.aeruginosa_PchC</i>           | -----MSAAWVRPFR-LTPM-----PRLRLACFPHA--GGSASFRRWSERLPP-D--IDLLALQYP-51            |
| <i>S.tendae_NikP2</i>              | -----MAPRQAAATRPDSPWLRTPGPPRPA-----APARLVCFPHA--GGAASYFRDWGGRDLA-G--AEVWAVQYP-62 |
| <i>S.erythraea_Eryorf5</i>         | -----MSTWLRRFPG-PVE-----HRARLVCFPHA--GAAADSYLDLARALAP-E--IDVHAVQYP-50            |
| <i>Kutzneria.sp744_KtzF</i>        | -----MSVEIAELVPESPYLWR-ARR-AG-----ARRRLICFPHA--GAGAAAADWVRWLPP-E--VELVAVQLP-59   |
| <i>A.migulanus_GrsT</i>            | -----MTFISQVKNWVFNANVN-SA-----AKLRLFCIPYA--GGGASAFYEWSHFFPK-E--IEVCSIQLP-56      |
| <i>B.licheniformis_BacT</i>        | -----MMLRCYAPVPGT-----PAHRLVCFPHA--GGSARAYRPFAL ELAAG--VETHAVQYP-50              |
| <i>B.brevis_TycF</i>               | -----MSTWLRRFPG-PVE-----HRARLVCFPHA--GAAADSYLDLARALAP-E--IDVHAVQYP-50            |
| <i>B.subtilis_SrfTEI_2RON</i>      | -----MSQLFKS-----FD-AS-----EKTQLICFPFA--GGYSASFRPLHAFLLQG-E--CEMLAAEPP-48        |
| <i>Rat_FAS_TEI</i>                 | -----VLNCLYQN-PD-----AVFKLICFPWA--GGGSIHFAKWGQKIND-S--LEVHAVRLA-61               |
| <i>B.subtilis_SrfTEI_1JMK</i>      | -----GLQDVTIMN-QD-----QEQIIFAFPPV--LYGLMYQNLSSRLP-S--YKLCADFDTI-51               |
| <i>E.coli_EntF_2ROQ</i>            | -----PTLFCFHPA--SGFAWQF SVLSRYLDP-Q--WSIIGIQSP-35                                |
| <i>B.subtilis_FenTE_2CB9</i>       | -----V IQLNQ-Q-----GGKNLFCFPP I--SGFGIYFKDLALQLNH-K--AAVYGFHF I-57               |
| <i>B.subtilis_Myc_TE</i>           | -----VKLN-QN-----GSIPVFCFPPL--IGYGLVYNEMANRLDG-D--CVVYAADFT-49                   |
| <i>B.licheniformis_BacC_TE</i>     | -----TRA-EE-----GGKNLFCFPPA--ASMG IAYMGLAKHLKQ-H--SVYSFNFI-46                    |
| <i>B.brevis_TycC_TE</i>            | -----ILLN-QE-----TARNVCFPTPI--GAQSVYYQKLA AE I QG--VSLYSFDFI-47                  |
| <i>B.brevis_GrsB_TE</i>            | -----ILLN-EE-----TDRNVFLFAPI--GAQGVFYKLA EQ IPT--ASLYGFDFI-44                    |
| <i>hFAS_TEI_1XKT</i>               | -----V-QS-----SERPLFLVHP I--EGSTTVFHSLSARLS-----IPTY-56                          |
| <i>S.venezuelae_PikTE_2HFJ</i>     | RPQFASPEACSE-RLDPVLLAGG--PTDRAEGRVLVCGCTGTAANGGPHEFLRLSTSFQE-E--RDFLAVPLP-105    |
| <i>S.fraidea_TyIGV</i>             | RPAFGTA--DRQ-PVALVPLADG--AEDTGLPL--LVGCAGTAVASGPVEFTAFAGALADLPAAPMAALPQP-106     |
| <i>Streptomyces.sp.CK4412_TmcB</i> | RLKYGDPAPEA-VPEIVRLGRG-QL--GPQLILVCPTVM--TG PQVYSRLAEELDA-G-RR-VSALVPP-94        |
| <i>S.erythraea_DEBSTE_1MO2</i>     | REHFDGSDGFS--LDLVDMDAG--P--GEVTVICAGTAAISGPHEFTRLAGALRG-I-AP-VRAVPQP-104         |
| <i>A.erythreum_EryAIII</i>         | RERSADPDVLAENV-VPVALGTS--G--DGPVLVCCAGTAAPSGPHEFARLAAALDG-S-WS-VLGLPQP-124       |
| <i>S.rochei_LkmAIII</i>            | RDHFTGPELDS-ASVDLVELASG--P--GEIRLVCVAGTAPVAGPHEFLRLAAAFEG-S-MP-VSALPQP-125       |
| <i>M.griseorubida_MycAV</i>        | RPQFDEASELAG-APEPVRLADG--P--GAIRLACVPAPMGMGGAHQYARFAERFRA-V-RP-VLAVPMP-133       |
| <i>S.parvulus_BorA6</i>            | RPAYREPAAELE--LPPLRLTSG--G--DEPPLFCIPSHLKGADPHKFLRFAAALRG-R-RD-VFVLRQP-134       |
| <i>S.noursei_NysK</i>              | RPMFDTPAELEE-LSEPVTLADG--P--GRPRLIFVSAPGATGVHQYARIAAHFRG-S-RH-VSALPLM-135        |

RifR Secondary structure

SrfTEI Secondary structure

PikTE Secondary structure

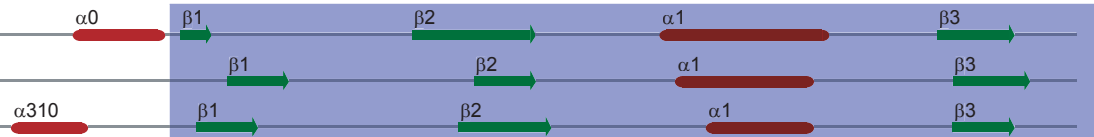



|                                    | 300                               | 310                       | 320                 | 330             | 340 | 350 | 360 |  |
|------------------------------------|-----------------------------------|---------------------------|---------------------|-----------------|-----|-----|-----|--|
| <i>A.mediterranei_RifR</i>         | AMLADPELLAMVLPAIRSDYRAVETYRHEPG   | --RRVDCPVTVFTGDHDP        | -----RVS            | -----VGEARA     | 210 |     |     |  |
| <i>A.noursei_NysE</i>              | ALLGDEEILRMLIPAIRSDYQAIETYRCPDP   | --VTVRAPLTVLTGDRDP        | -----KTS            | -----LDEAEA     | 211 |     |     |  |
| <i>S.fraidea_TyIO</i>              | GALADEEVLRMVLPALRSDYAAVGRYRHVPG   | --PRPGCLTVFTGDADP         | -----NVT            | -----LPEAEA     | 209 |     |     |  |
| <i>S.venezuelae_PikAV</i>          | RFLQDDELLRVLPALRSDYKAAETYLHRPS    | --AKLTCPVMALAGDRDP        | -----KAP            | -----LNEVAE     | 215 |     |     |  |
| <i>P.aeruginosa_PchC</i>           | ELLEADALRALFLPILRADYQAIETYRRAQP   | --IALACALDVLGEGHDE        | -----EVS            | -----AAEAQA     | 203 |     |     |  |
| <i>S.tendae_NikP2</i>              | GLLDDPDMRSVFLPAVRDDYRIVQSYVPRAG   | --GPLLRTDVTAFVGRQDE       | -----AVG            | -----VGDAGA     | 223 |     |     |  |
| <i>S.erythraea_Eryorf5</i>         | AALAEALLAMSLPVLRADYVLRSYAWADG     | --PPLRAGITALCGDADP        | -----LTA            | -----TGDAER     | 204 |     |     |  |
| <i>Kutzneria.sp744_KtzF</i>        | EIAADPDVIGSLLDVLRADFELWERHVPPTG   | --PPLDCPITVLAGDADP        | -----RAP            | -----RAELAA     | 214 |     |     |  |
| <i>A.migulanus_GrsT</i>            | IVLQDAEMMSILLPRLRADFSVCGSYQYK     | --N-DEPFECPIATFGGKNDN     | -----GVT            | -----YQSLEA     | 212 |     |     |  |
| <i>B.licheniformis_BacT</i>        | ELINHEELFELFIPILKSDFKMVENYIQER    | --NSKIDCDITVLNGKEDA       | -----MS             | -----KEDVSD     | 192 |     |     |  |
| <i>B.brevis_TycF</i>               | DVLENQELLEFLPILRADFQAVQTYEMNPDL   | --PRQVPMNMTLVYGTEDT       | -----IA             | -----LEDIWA     | 196 |     |     |  |
| <i>B.subtilis_SrfTEI_2RON</i>      | ELVENKEVMSFFLPSFRSDYRALQFELYDL    | --AQIQSPVHVFNGLDDK        | -----KC             | -----IRDAEG     | 199 |     |     |  |
| <i>Rat_FAS_TEI</i>                 | HLIEDQDVLRFMLPILLKADAGVVKKFI      | --FDKPSKALLSLDITGFLGSED   | -----T              | -----IKDIEG     | 219 |     |     |  |
| <i>B.subtilis_SrfTEI_1JMK</i>      | E-----AVKHGLKQKTHAFYSYVNL         | ISTGQVKADIDLLTSGAD        | -----FDI            | -----PEWLAS     | 188 |     |     |  |
| <i>E.coli_EntF_2ROQ</i>            | AQQGSTSTELFTTIEGNYADAVRLLTTA      | --HS--VPFDKATLFAAERT      | -----LQ             | -----E--GMSPERA | 189 |     |     |  |
| <i>B.subtilis_FenTE_2CB9</i>       | -----AVRETVMQKKRCYQEYWAQL         | INEGRIKSNIHFIEAGIQT       | -----ETSG           | -----AMVLQK     | 184 |     |     |  |
| <i>B.subtilis_Myc_TE</i>           | L-----LTIPISEKIRGYLAYHNQL         | INSGTINANIHHLLCDD         | -----MTERG          | -----           | 183 |     |     |  |
| <i>B.licheniformis_BacC_TE</i>     | VEKL--LSDYLVDLV--MKSyv-YIQNTVTTGA | IGHISYIKS-SD              | -----NQR            | -----GENMMM     | 182 |     |     |  |
| <i>B.brevis_TycC_TE</i>            | DFQLYAAN-EFVKQSFVRKTVSYVMFHNNLVNT | GMTTAAIHLIQSELE           | -----ADEEAPVAAKWNSA | 202             |     |     |     |  |
| <i>B.brevis_GrsB_TE</i>            | DFELYFAN-EFVKQSFTRKMRKYSFYTQLVNY  | GEVATIHLIQAEFEEEKIDENEKAD | -----EETKYL         | EKKWNEKA        | 210 |     |     |  |
| <i>hFAS_TEI_1XKT</i>               | SHQGLDR-QEL-SFAARSFY-YKLRAAEQYTP  | KAKEYGNVMLLRAKTG          | -----GAYGE          | -----DLGADYN    | 250 |     |     |  |
| <i>S.venezuelae_PikTE_2HFJ</i>     | -----DARLLAMGRYARFLAG-PRPGRS      | SAPVLLVRA-SEP             | -----LGDW           | -----QEEGRD     | 250 |     |     |  |
| <i>S.fraidea_TyIGV</i>             | -----DHRLTAMGAYHRLLLD-WSPT        | PVRAPVLLHRA-AEP           | -----MGDW           | -----PPGDTG     | 245 |     |     |  |
| <i>Streptomyces.sp.CK4412_TmcB</i> | -----SQRITAQVWCLELL-RG--WRPEGL    | TAPTLYVRP-AQ              | -----PLV            | -----EQEKPE     | 236 |     |     |  |
| <i>S.erythraea_DEBSTE_1MO2</i>     | -----DTRLTALGAYDRLTGQ-WRPRET      | GLPTLLVSA-GEP             | -----MGPW           | -----P-DDS      | 241 |     |     |  |
| <i>A.erythreum_EryAIII</i>         | -----DTRLTAMGAYDRMLGG-WVPDD       | QQVATLLVRA-VDP            | -----IAAW           | -----P-DDD      | 261 |     |     |  |
| <i>S.rochei_LkmAIII</i>            | -----DTRLTALGAYHRFTST-WQPRDL      | AVPTLLVRA-CEP             | -----LGEW           | -----PDGTS      | 262 |     |     |  |
| <i>M.griseorubida_MycAV</i>        | -----TARLTGMARYARLLDR-CAVGE       | PVPLFVRP-GKL              | -----FVLD           | -----GQPQ       | 276 |     |     |  |
| <i>S.parvulus_BorA6</i>            | -----EAWLTAMGHYFGFD--WTPC         | PVDVPLHVRA-GDP            | -----MTGM           | -----PVEGR      | 270 |     |     |  |
| <i>S.noursei_NysK</i>              | -----SAMAHWFAMMTDIQAPAPTAPT       | LLVRA-ARA                 | -----LDGF           | -----R-LD       | 275 |     |     |  |

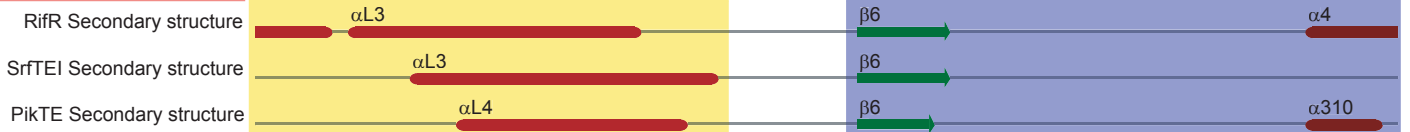

|                                    | 380                       | 390                      | 400           | 410       | 420    | 430   |     |
|------------------------------------|---------------------------|--------------------------|---------------|-----------|--------|-------|-----|
| <i>A.mediterranei_RifR</i>         | WEEHTT-GPADLRVLPGGHFFLV   | -----QAAPMIATMTEKL       | -----         | -----     | -----  | ----- | 246 |
| <i>A.noursei_NysE</i>              | WRGHTT-GDFDLKVLPGGHFFVSS  | -----EAPAIIDLRAHL        | -----         | -----     | -----  | ----- | 247 |
| <i>S.fraidea_TyIO</i>              | WRELTT-GAFALRVFPGGHFYLND  | -----QREAVCRTIETL        | -----         | -----     | -----  | ----- | 245 |
| <i>S.venezuelae_PikAV</i>          | WRRHTS-GPFCRLRAYSGGHFYLND | -----QWHEICNDISDHLVLT    | -----         | -----     | -----  | ----- | 254 |
| <i>P.aeruginosa_PchC</i>           | WSDASR-TPARLRRFPGGHFYLSE  | -----GRDAVIEHLLRRL       | -----         | -----     | -----  | ----- | 239 |
| <i>S.tendae_NikP2</i>              | WAGATL-GRFTLRFPGGHFYLGE   | -----HPDHVLHALR-EVL      | -----         | -----     | -----  | ----- | 259 |
| <i>S.erythraea_Eryorf5</i>         | WLQHSV-IPGRTRTFPGGHFYLGE  | -----QVTEVAGAVR-RDL      | -----         | -----     | -----  | ----- | 240 |
| <i>Kutzneria.sp744_KtzF</i>        | WRACTT-AEFTTRFFTGGHFYLVD  | -----SLAEVVG             | -----         | -----     | -----  | ----- | 244 |
| <i>A.migulanus_GrsT</i>            | WREQTK-REFSVCMPGDHFFLYE   | -----SKYEMIEFMCKQLR      | -----         | -----     | -----  | ----- | 249 |
| <i>B.licheniformis_BacT</i>        | WKHHTS-GHFTAYYFEGNHFFLHH  | -----HVEKITEIINHSLTA     | -----         | -----     | -----  | ----- | 230 |
| <i>B.brevis_TycF</i>               | WRDYCQ-GACQFFPVSGGHFFIHH  | -----QTSPILEIINQVLKE     | -----         | -----     | -----  | ----- | 234 |
| <i>B.subtilis_SrfTEI_2RON</i>      | WKKW-A-KDITTFHFGCGHMFLLS  | -----QTEEVAERIFAILNQH    | -----         | -----     | -----  | ----- | 237 |
| <i>Rat_FAS_TEI</i>                 | WQDLTS-GKFDVHMLPGDHFYLKMP | -----DNENFIKNYIAKCLELS   | -----         | -----     | -----  | ----- | 260 |
| <i>B.subtilis_SrfTEI_1JMK</i>      | WEEATT-GAYRMKRGFTHAEMLQG  | -----ETLDRNAGILLEFLNTQT  | -----         | -----     | -----  | ----- | 230 |
| <i>E.coli_EntF_2ROQ</i>            | WSPWI-A-ELDIYRQDCAHVDIISP | -----GTFEKIGPIRATLNRLE   | -----         | -----     | -----  | ----- | 230 |
| <i>B.subtilis_FenTE_2CB9</i>       | WQDAAE-EGYAETGYCAHKDMLG   | -----EFAEKNANIILNILDKINS | -----DQKVL    | PNKHGS    | -----  | ----- | 238 |
| <i>B.subtilis_Myc_TE</i>           | WTHSTA-HNYKEYELKGDHVTIFDP | -----QYIENMSTIRSIMKCI    | -----EEQQLGEL | VPHEQL    | SYMSRT | KSDRT | 249 |
| <i>B.licheniformis_BacC_TE</i>     | WEKATS-KTFTVVQAGTTHMQMIS  | SKSHPDILERNARLIHDIIIN    | -----KTVKI    | -----     | -----  | ----- | 229 |
| <i>B.brevis_TycC_TE</i>            | WANATQ-RLLYTSGHCISRMLAG   | -----DYASQNASILKNILQEL   | FILK          | -----     | -----  | ----- | 246 |
| <i>B.brevis_GrsB_TE</i>            | WNKAAK-RFVKYNGYCAHSNMLGG  | -----DGLERNSSLKQILQGT    | FVVK          | -----     | -----  | ----- | 254 |
| <i>hFAS_TEI_1XKT</i>               | LSQVCDG-KVSVHVIEGDHRTLL   | LEG---SGLESIISIHSSLA     | -----         | -----     | -----  | ----- | 289 |
| <i>S.venezuelae_PikTE_2HFJ</i>     | WRAHWD-LPHTVADVPGDHFTMMRD | -----HAPAVAEAVLSWLD      | IEGTEGAGK     | -----     | -----  | ----- | 298 |
| <i>S.fraidea_TyIGV</i>             | WQSHWD-GAHTTAGIPGNHFTMMTE | -----HASAAARLVHGWL       | AERTPSGQGGSP  | SRAAGREER | -----  | ----- | 304 |
| <i>Streptomyces.sp.CK4412_TmcB</i> | WRGDVLAAAGQVVEAPGDHFTIIEG | -----EHVASTAHIVGDWLR     | TEE           | -----     | -----  | ----- | 279 |
| <i>S.erythraea_DEBSTE_1MO2</i>     | WKPTWP-FEHDTVAVPGDHFTMVQE | -----HADAIARHIDAWL       | GGNSSSV       | DKLA      | AAALE  | ----- | 294 |
| <i>A.erythreum_EryAIII</i>         | WRASWP-FAHATADVPGDHFTMMQE | -----HAGQVAARITDWEAR     | -----         | -----     | -----  | ----- | 301 |
| <i>S.rochei_LkmAIII</i>            | WQSTWP-FPHTCVDVPGNHFSMVQE | -----HAGVAER-IRTW        | -----         | -----     | -----  | ----- | 298 |
| <i>M.griseorubida_MycAV</i>        | WRASWR-RMDTVREVPGNHFTMLE  | -----EVAATAEVVSW-        | IAGLR         | -----     | -----  | ----- | 317 |
| <i>S.parvulus_BorA6</i>            | WQARWN-LPHTAVDVPGDHFTMMED | -----HAPRTADTVHDWL       | GTAVRR        | PERTR     | -----  | ----- | 318 |
| <i>S.noursei_NysK</i>              | --TSSV-PADEVDRIDADHLSLAKE | -----HSALTAQAI           | EGWL          | AEL       | PDPAA  | ----- | 318 |

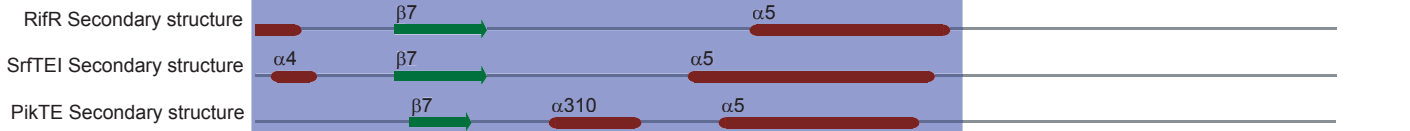

**Supplementary Figure 1.** Structure-based sequence alignment of TEIs and TEIIs. PKS/NRPS/FAS TEIIs and TEIs were first aligned using the EXPRESSO(3DCoffee) server (1), then manually edited based on 3-D structures. Conserved residues were highlighted with Jalview 2.4 (2). Asterisks mark the active site residues of both TEIs and TEIIs. TEII sequences are highlighted in violet, FAS/NRPS TEIs in green, and PKS TEIs in red. The following TEIs were aligned: *A. mediterranei*\_RifR (AAG52991), *A. noursei*\_NysE (AAF71777), *S. fraidea*\_TylO (AAA21345), *S. venezuelae*\_PikAV (AAC69333), *P. aeruginosa*\_PchC (CAA57967), *S. tendae*\_NikP2 (CAC11138), *S. erythraea*\_Eryorf5 (AAA26497), *Kutzneria.sp744* (ABV56586), *A. migulanus*\_GrsT (P14686), *B. licheniformis*\_BacT (BAA36683), *B. brevis*\_TycF (AAC45933), *B. subtilis*\_SrfTEII\_2RON (AAF87217), Rat\_FAS\_TEII (CAA68411), *B. subtilis*\_SrfTEI\_1JMK (1JMK), *E. Coli*\_EntF\_2ROQ (2ROQ), *B. subtilis*\_FenTE\_2CB9 (2CB9), *B. subtilis*\_Myc\_TE (AAF08797), *B. licheniformis*\_BacC\_TE (AAC06348), *B. brevis*\_TycC\_TE (AAC45930), *B. brevis*\_GrsB\_TE (AAC06348), hFAS\_TEI\_1XKT (1XKT), *S. venezuelae*\_PikTE\_2HFJ (2HFJ), *S. fraidea*\_TylGV (AAB66508.1), *Streptomyces.sp.CK4412*\_tmcB (AB194380), *S. erythraea*\_DEBSTE\_1MO2 (1MO2), *A. erythreum*\_EryAIII (AAU93805.2), *S. rochei*\_LkmAIII (BAC76491), *M. griseorubida*\_MycAV (BAC57032.1), *S. parvulus*\_BorA6 (CAE45672.1), *S. noursei*\_NysK (AAF71768).

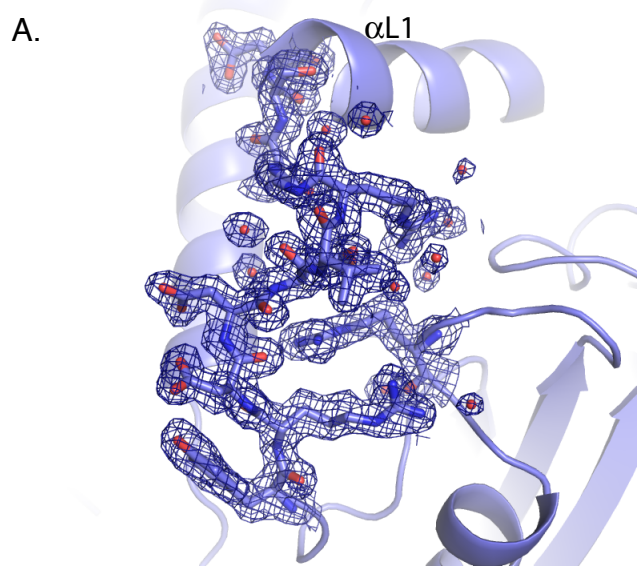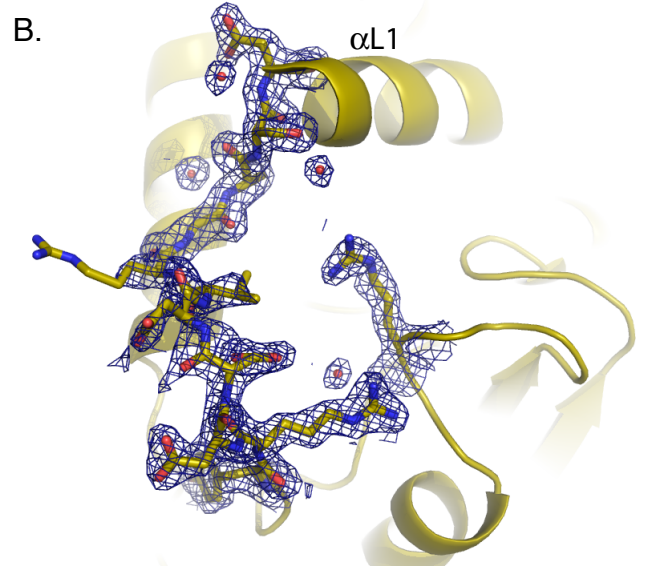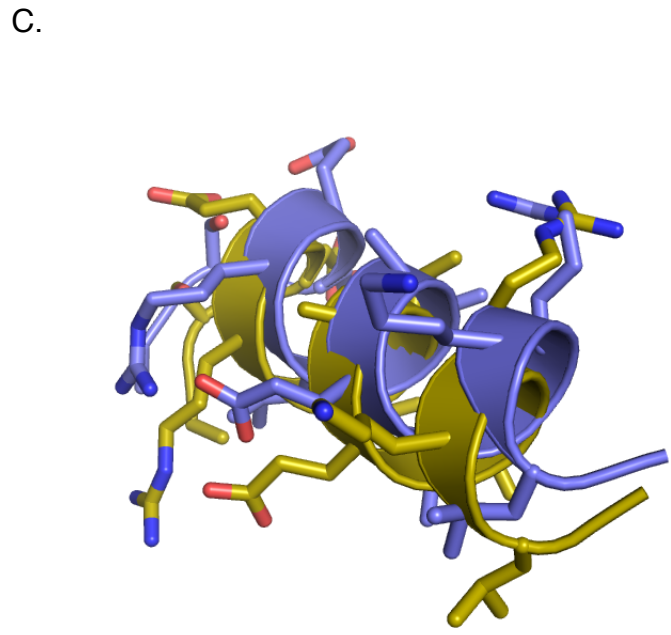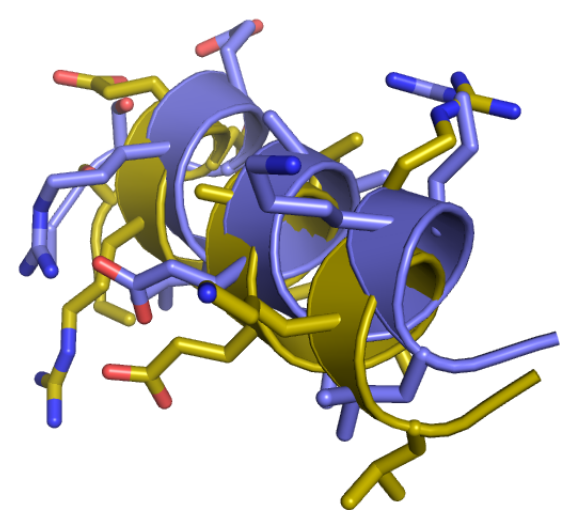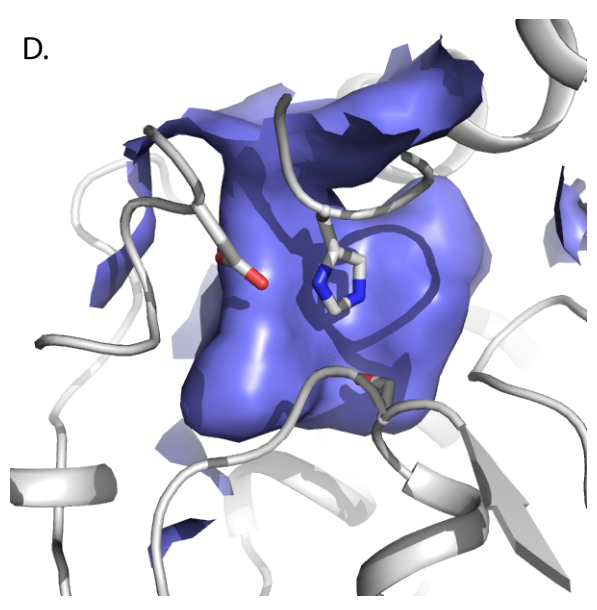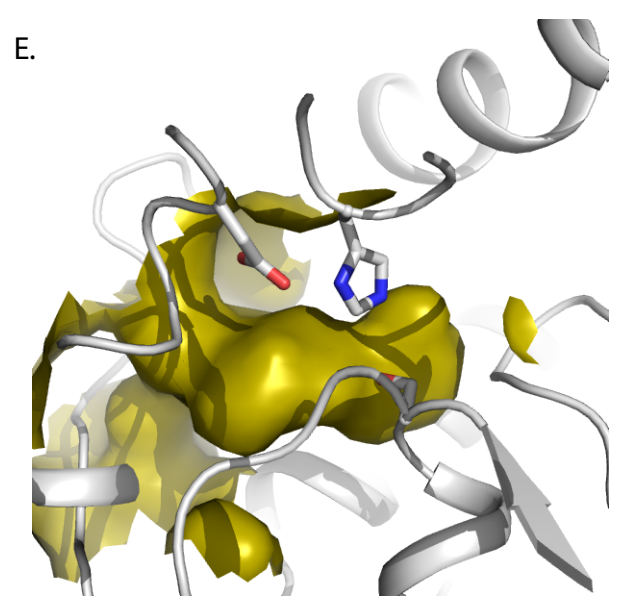

Supplementary Figure 2. Electron density and model for flexible linker region for form 1 (A. – experimental density contoured at  $1\sigma$ ) and for form 2 (B. –  $2Fo-Fc$  refined density contoured at  $1\sigma$ ). C. Stereodialog of  $\alpha$ L1 helices from form 1 (blue) and form 2 (gold). Form 1 (D.) and form 2 (E.) substrate chambers have unique shapes, and different access to the exterior of RifR.

## References

1. Armougom, F., Moretti, S., Poirot, O., Audic, S., Dumas, P., Schaeli, B., Keduas, V., and Notredame, C. (2006) *Nucl. Acids Res.* **34**, W604-608
2. Clamp, M., Cuff, J., Searle, S. M., and Barton, G. J. (2004) *Bioinformatics* **20**, 426-427
